# Supplementary material for: Highly stable colorimetric aptamer sensors for detection of ochratoxin A through optimizing the sequence with the covalent conjugation of hemin
Source: Royal Society of Chemistry journal article supplement (doi:10.1039/c3an01639k), 2014-01-01
Supplement: c3an01639k.pdf [file c3an01639k.pdf]

Electronic Supplementary Information

**Highly Stable Colorimetric Aptamer Sensor for Ochratoxin A through  
Optimizing the Sequence with the Covalent Conjugation of Hemin**

Jayeon Lee<sup>a,b</sup>, Chang Hoon Jeon<sup>a,b</sup>, Sang Jung Ahn<sup>c</sup>, and Tai Hwan Ha<sup>\*a,b</sup>

<sup>a</sup> Nanobiotechnology (Major), School of Engineering, University of Science & Technology Centre, Daejeon 305-350, Yuseong-gu, Republic of Korea. Fax: 82 42 879 8596; Tel: 82 42 860 4272; E-mail: [taihwan@kribb.re.kr](mailto:taihwan@kribb.re.kr)

<sup>b</sup> Research center of integrative cellolomics, Korea Research Institute of Bioscience and Biotechnology (KRIBB), Yuseong-gu, Daejeon 305-806, Republic of Korea. Fax: 82 42 879 8596; Tel: 82 42 860 4272; E-mail: [taihwan@kribb.re.kr](mailto:taihwan@kribb.re.kr)

<sup>c</sup> Center for Nano-Imaging Technology, Division of Industrial Metrology, Korea Research Institute of Standards and Science (KRISS), Yuseong-gu, Daejeon 305-340, Republic of Korea

Corresponding author: T. H. Ha, [taihwan@kribb.re.kr](mailto:taihwan@kribb.re.kr)

### 1. Binding affinity of EAD2-hemin complex

500 nM hemin was prepared in 100 mM phosphate buffer (pH 6.7) with 200 mM NaCl, 20 mM MgCl<sub>2</sub>, and 5 mM KCl. Two additional adenosines were added on the 5'-end of original EAD2 sequence. EAD2 was dissolved in same buffer as used for hemin. Hemin and EAD2 mixtures with 6 different molar ratio were mixed and stood for at least an hour, and the dissociation constant ( $K_d$ ) for the DNA-hemin complexes was determined by plotting the absorbance changes of hemin (0.5  $\mu$ M) at 404nm against DNA concentrations (0 -10  $\mu$ M). The  $K_d$  for EAD2 was determined to be 770 nM.

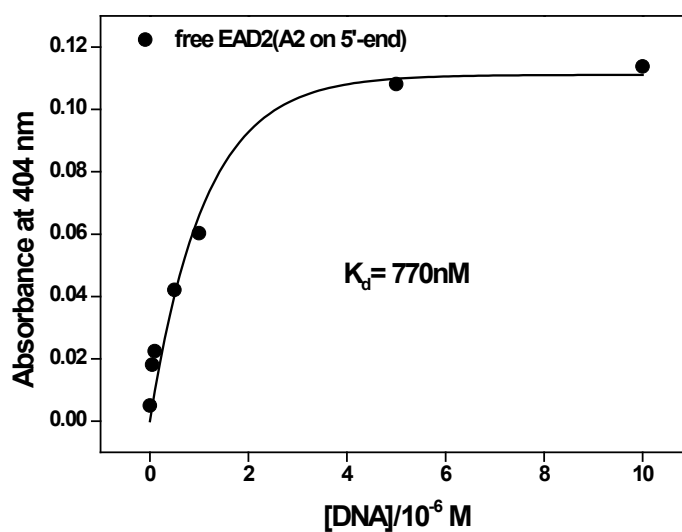

Figure S1. A plot for obtaining the dissociation constant for EAD2-hemin

## 2. A plot of enzymatic reaction velocities of OHD<sub>0</sub>

Each sample was dissolved in 100 mM phosphate buffer with 200 mM NaCl, 20 mM MgCl<sub>2</sub>, and 5 mM KCl. Absorbance was measured for initial 5 min in each experiment. [OHD<sub>0</sub>] = 500 nM, [hemin] = 1.5 μM.

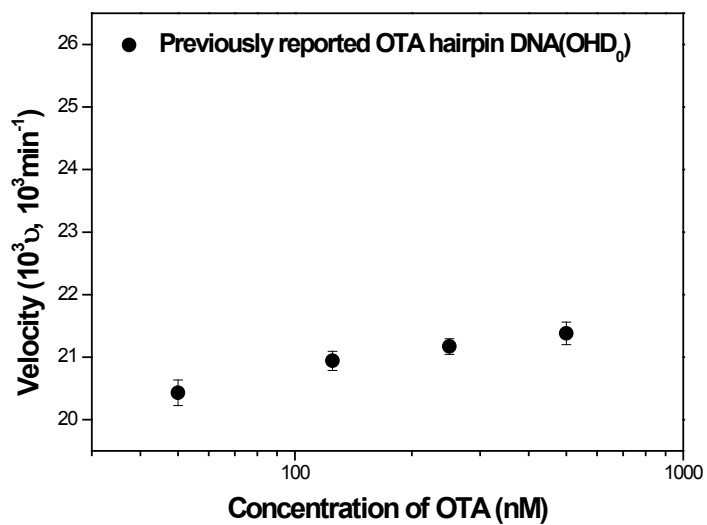

Figure S3. A plot of enzymatic reaction velocities of OHD<sub>0</sub> against different OTA concentration.

### 3. Linear plots of enzymatic velocities of a few OHD<sub>1</sub> derivatives

Each sample was dissolved in 100 mM phosphate buffer with 200 mM NaCl, 20 mM MgCl<sub>2</sub>, and 5 mM KCl. Absorbance was measured for initial 5 minutes in each experiment.

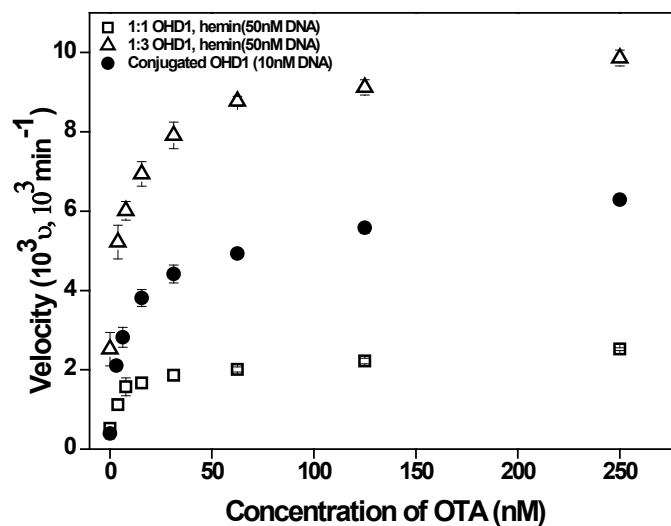

Figure S3. The linear plot of enzymatic velocities of OHD<sub>1</sub> with various hemin conditions
